# Supplementary material for: Impacts of Coal Burning on Ambient PM 2.5 Pollution in China
Source: Copernicus journal article supplement (doi:10.5194/acp-2016-601), 2016-09-09
Supplement: Supplementary file 1 [file acp-2016-601-supplement.pdf]

Supplement of

## Impacts of Coal Burning on Ambient PM<sub>2.5</sub> Pollution in China

Qiao Ma<sup>1</sup>, Siyi Cai<sup>1</sup>, Shuxiao Wang<sup>1, 2</sup>, Bin Zhao<sup>3</sup>, Randall V. Martin<sup>4</sup>, Michael Brauer<sup>5</sup>, Aaron Cohen<sup>6</sup>, Jingkun Jiang<sup>1, 2</sup>, Wei Zhou<sup>1</sup>, Jiming Hao<sup>1, 2</sup>, Joseph Frostad<sup>7</sup>, Mohammad H. Forouzanfar<sup>7</sup>, Richard T. Burnett<sup>8</sup>

Correspondence to: Shuxiao Wang (shxwang@tsinghua.edu.cn)

Table S1 Summary of the major assumptions of the energy scenario.

|                                                           | 2010  | 2013  |
|-----------------------------------------------------------|-------|-------|
| GDP (2005 price)/billion CHY <sup>a</sup>                 | 31165 | 39486 |
| Population/billion                                        | 1.34  | 1.36  |
| Urbanization rate/%                                       | 49.7  | 53.7  |
| Power generation/TWh                                      | 4205  | 5398  |
| Share of coal-fired power generation/%                    | 75.3  | 66.4  |
| Crude steel yield/Mt                                      | 627   | 779   |
| Cement yield/Mt                                           | 1880  | 2417  |
| Urban residential building area per capita/m <sup>2</sup> | 23    | 23    |
| Rural residential building area per capita/m <sup>2</sup> | 34.1  | 37    |
| Vehicle population per 1000 persons                       | 58.2  | 93.6  |
| Share of new and renewable energy/% <sup>b</sup>          | 7.5   | 8.3   |

a CHY, Chinese Yuan.

b Including hydro power, solar energy, wind energy, ocean energy, and nuclear energy; excluding biomass.

Table S2. Penetrations of major control technologies in power sector in China (%).

| Energy technology          | Control technology          | 2010 | 2013 |
|----------------------------|-----------------------------|------|------|
| Grate boilers              | CYC (PM)                    | 12   | 10   |
|                            | WET (PM)                    | 88   | 90   |
| Pulverized coal combustion | WET (PM)                    | 0    | 0    |
|                            | ESP (PM)                    | 93   | 85   |
|                            | HED (PM)                    | 7    | 15   |
|                            | FGD (SO <sub>2</sub> )      | 88   | 93   |
|                            | LNB (NO <sub>x</sub> )      | 75   | 38   |
|                            | LNB+SNCR (NO <sub>x</sub> ) | 1    | 2    |
|                            | LNB+SCR (NO <sub>x</sub> )  | 12   | 54   |

|                          |                             |     |    |
|--------------------------|-----------------------------|-----|----|
| Fluidized bed combustion | WET (PM)                    | 0   | 0  |
|                          | ESP (PM)                    | 100 | 85 |
|                          | HED (PM)                    | 0   | 15 |
|                          | CFB-FGD (SO <sub>2</sub> )  | 53  | 53 |
|                          | SNCR (NO <sub>x</sub> )     | 0   | 0  |
|                          | SCR (NO <sub>x</sub> )      | 0   | 0  |
| Natural gas power        | LNB (NO <sub>x</sub> )      | 74  | 70 |
|                          | LNB+SNCR (NO <sub>x</sub> ) | 1   | 0  |
|                          | LNB+SCR (NO <sub>x</sub> )  | 5   | 15 |

Notes: CYC, cyclone dust collector; WET, wet scrubber; ESP, electrostatic precipitator; HED, high efficiency deduster; FGD, flue gas desulfurization; CFB-FGD, flue gas desulfurization for circulated fluidized bed; LNB, low NOX combustion technology; SCR, selective catalytic reduction; SNCR, selective non-catalytic reduction. The table gives the national average penetrations of major control technologies. However, the penetrations vary with provinces. The penetration of the “key region” is usually larger than that of other regions.

Table S3. Penetrations of major control technologies in industrial and domestic combustion sources in China (%).

| Energy technology        | Control technology         | 2010 | 2013 |
|--------------------------|----------------------------|------|------|
| Industrial grate boilers | CYC (PM)                   | 0    | 0    |
|                          | WET (PM)                   | 95   | 85   |
|                          | ESP (PM)                   | 0    | 10   |
|                          | HED (PM)                   | 5    | 5    |
|                          | WET (SO <sub>2</sub> )     | 95   | 70   |
|                          | FGD (SO <sub>2</sub> )     | 1    | 30   |
|                          | LNB (NO <sub>x</sub> )     | 0    | 18   |
|                          | LNB+SCR (NO <sub>x</sub> ) | 0    | 5    |
| Domestic boilers         | CYC (PM)                   | 14   | 15   |
|                          | WET (PM)                   | 78   | 85   |
|                          | DC (SO <sub>2</sub> )      | 0    | 5    |
| Coal stoves              | STV_ADV_C                  | 0    | 0    |
| Biomass stoves           | STV_ADV_B                  | 0    | 0    |
|                          | STV_PELL                   | 0    | 0    |

Notes: DC, application of (low-sulfur) derived coal; STV\_ADV\_C, replacement of advanced coal stove;  
 STV\_ADV\_B, replacement of advanced biomass stove (e.g. better combustion condition, catalytic stove);  
 STV\_PELL, biomass pellet stove.

Table S4. Penetrations of major control technologies for selected industrial process in China (%).

(1) SO<sub>2</sub>

| Industrial process               | Control technology                    | 2010 | 2013 |
|----------------------------------|---------------------------------------|------|------|
| Sintering                        | FGD                                   | 10   | 30   |
|                                  | FGD for coal filling process          | 0    | 5    |
| Coke oven                        | FGD for coke oven gas                 | 0    | 5    |
|                                  | Combination of the technologies above | 0    | 0    |
|                                  |                                       |      |      |
| Glass production (float process) | FGD                                   | 0    | 8    |
| Sulfuric acid production         | Ammonia acid desulfurization method   | 0    | 10   |

(2) NO<sub>x</sub>

| Industrial process                  | Control technology | 2010 | 2013 |
|-------------------------------------|--------------------|------|------|
| Sintering                           | SCR                | 0    | 7    |
|                                     | SNCR               | 0    | 0    |
|                                     | LNB+SCR            | 0    | 0    |
| Precalcined cement kiln             | LNB+SNCR           | 0    | 1    |
|                                     | LNB                | 35   | 47   |
| Glass production (float process)    | OXFL               | 0    | 16   |
|                                     | SCR                | 0    | 8    |
| Nitric acid (dual pressure process) | ABSP               | 12   | 16   |
|                                     | SCR                | 18   | 30   |
|                                     | ABSP+SCR           | 0    | 0    |
| Nitric acid (other process)         | ABSP               | 63   | 65   |
|                                     | SCR                | 32   | 33   |
|                                     | ABSP+SCR           | 0    | 5    |

Notes: ABSP, absorption method; OXFL, oxy-fuel combustion technology.

## (3) PM

| Industrial process       | Control technology | 2010 | 2013 |
|--------------------------|--------------------|------|------|
|                          | CYC                | 0    | 0    |
| Sintering (flue gas)     | WET                | 5    | 0    |
|                          | ESP                | 75   | 75   |
|                          | HED                | 20   | 25   |
|                          | WET                | 100  | 100  |
| Blast furnace (flue gas) | ESP                | 100  | 100  |
|                          | ESP                | 30   | 25   |
| Basic oxygen furnace     | HED                | 70   | 75   |
|                          | WET                | 30   | 20   |
| Electric arc furnace     | ESP                | 50   | 50   |
|                          | HED                | 20   | 30   |
|                          | WET                | 100  | 100  |
| Coke oven                | HED                | 0    | 0    |
|                          | WET                | 0    | 0    |
| Precalcined cement kiln  | ESP                | 40   | 35   |
|                          | HED                | 60   | 65   |
|                          | CYC                | 0    | 0    |
| Glass production         | WET                | 20   | 20   |
|                          | ESP                | 75   | 75   |
|                          | HED                | 5    | 5    |
|                          | CYC                | 30   | 30   |
| Brick production         | WET                | 20   | 20   |
|                          | ESP                | 20   | 20   |
|                          | HED                | 0    | 0    |

## (4) NMVOC

| Industrial process   | Control technology                 | 2010 | 2013 |
|----------------------|------------------------------------|------|------|
| Coke oven            | No control                         | 100  | 100  |
|                      | End of pipe control measures       | 0    | 0    |
| Refinery             | No control                         | 100  | 93   |
|                      | Leak detection and repair program  | 0    | 5    |
|                      | Covers on oil and water separators | 0    | 2    |
|                      | Combination of the above options   | 0    | 0    |
| Plant oil extraction | No control                         | 90   | 87   |
|                      | Activated carbon adsorption        | 10   | 12   |

|                                    |                                                                                                                                 |     |     |
|------------------------------------|---------------------------------------------------------------------------------------------------------------------------------|-----|-----|
|                                    | Schumacher type DTDC and activated carbon adsorption                                                                            | 0   | 1   |
|                                    | Schumacher type DTDC and new recovery section                                                                                   | 0   | 0   |
|                                    | No control                                                                                                                      | 100 | 95  |
| Pharmacy                           | Primary measures and low-level end-of-pipe measures                                                                             | 0   | 5   |
|                                    | Primary measures and high-level end-of-pipe measures                                                                            | 0   | 0   |
|                                    | No control                                                                                                                      | 95  | 90  |
| Gasoline storage                   | IFC (Internal floating covers or secondary seals)                                                                               | 5   | 10  |
|                                    | No control                                                                                                                      | 85  | 80  |
| Gasoline loading and unloading     | Stage IA (Vapor recovery systems and modified loading techniques)                                                               | 15  | 20  |
|                                    | No control                                                                                                                      | 85  | 80  |
| Service station                    | Stage IB + Stage II (Improvement in service station tank and vapor balancing system between a vehicle and service station tank) | 15  | 20  |
| Crude oil storage and distribution | No control                                                                                                                      | 100 | 100 |
|                                    | IFC + Stage IA + Stage IB + Storage II                                                                                          | 0   | 0   |

Table S5. Penetrations of major control technologies for NMVOC emissions from selected solvent use types in China (%).

| Solvent use type                        | Control technology                                                   | 2010 | 2013 |
|-----------------------------------------|----------------------------------------------------------------------|------|------|
|                                         | No control (GB18582-2001)                                            | 0    | 0    |
| Paint use in interior wall of buildings | Decrease of solvent content--GB18582-2008                            | 100  | 97   |
|                                         | Decrease of solvent content--2004/42/EC stage 1                      | 0    | 3    |
|                                         | Decrease of solvent content--2004/42/EC stage 2                      | 0    | 0    |
|                                         | No control (solvent-based paint)                                     | 78   | 75   |
| Paint use in external wall of buildings | Substitution with water-based paint                                  | 22   | 25   |
|                                         | No control (water-based primer, solvent-based paint for other parts) | 97   | 94   |
| Paint use in vehicle manufacturing      | Substitution with water-based paint                                  | 2    | 3    |

|                                                        |                                                    |    |    |
|--------------------------------------------------------|----------------------------------------------------|----|----|
|                                                        | Adsorption, incineration                           | 1  | 3  |
|                                                        | Substitution + adsorption, incineration            | 0  | 0  |
| Paint use in vehicle refinishing                       | No control (solvent-based paint)                   | 93 | 90 |
|                                                        | Substitution with high solids or water-based paint | 8  | 10 |
|                                                        | No control (solvent-based paint)                   | 89 | 84 |
|                                                        | Incineration                                       | 0  | 1  |
| Paint use in wood coating                              | Substitution with high solids paint                | 4  | 6  |
|                                                        | Substitution with water-based or UV paint          | 7  | 9  |
|                                                        | No control (solvent-based ink)                     | 90 | 88 |
| Offset printing                                        | Substitution with water-based or UV ink            | 10 | 13 |
|                                                        | Add-on control technology                          | 0  | 0  |
|                                                        | No control (solvent-based ink)                     | 64 | 60 |
|                                                        | Substitution with low solvent or water-based ink   | 35 | 38 |
| Flexography and rotogravure printing (for packaging)   | Add-on control technology                          | 1  | 3  |
|                                                        | Substitution + add-on control technology           | 0  | 0  |
|                                                        | No control (solvent-based ink)                     | 85 | 83 |
|                                                        | Substitution with low solvent or water-based ink   | 15 | 18 |
| Flexography and rotogravure printing (for publication) | Add-on control technology                          | 0  | 0  |
|                                                        | Substitution + add-on control technology           | 0  | 0  |
|                                                        | No control (solvent-based ink)                     | 85 | 83 |
|                                                        | Substitution with low solvent or water-based ink   | 15 | 18 |
| Screen printing                                        | Add-on control technology                          | 0  | 0  |
|                                                        | Substitution + add-on control technology           | 0  | 0  |
|                                                        | No control                                         | 98 | 95 |
|                                                        | Add-on control technology                          | 3  | 5  |
| Adhesive use in wood processing                        | No control (solvent-based adhesive)                | 87 | 85 |
| Adhesive use in manufacturing of shoes                 | Substitution with low solvent adhesive             | 13 | 15 |
|                                                        | Add-on control technology                          | 0  | 0  |

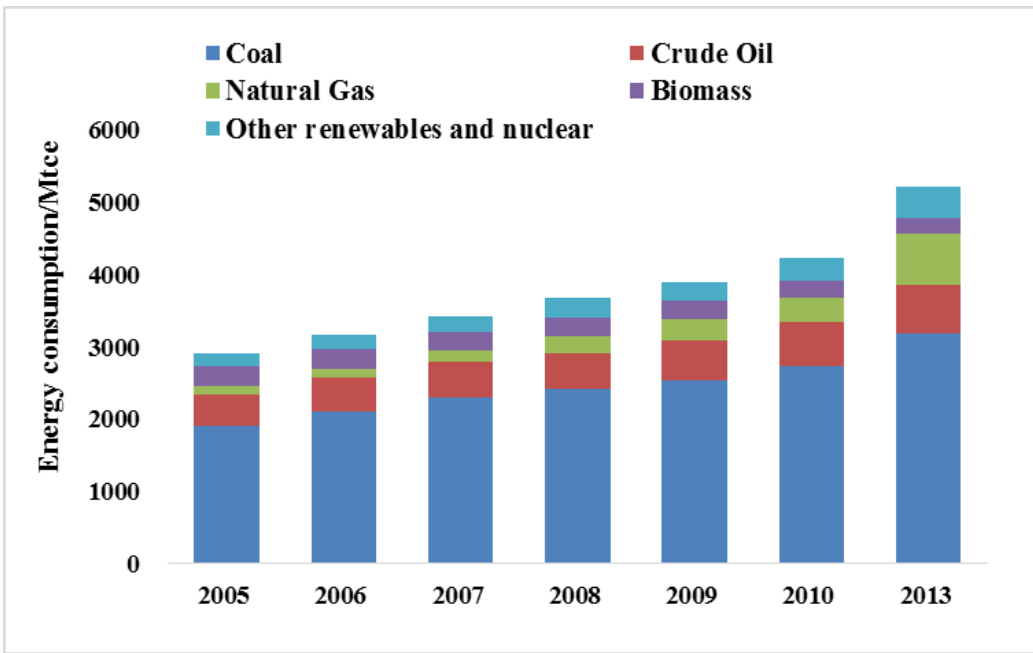

(a) Energy consumption by fuel

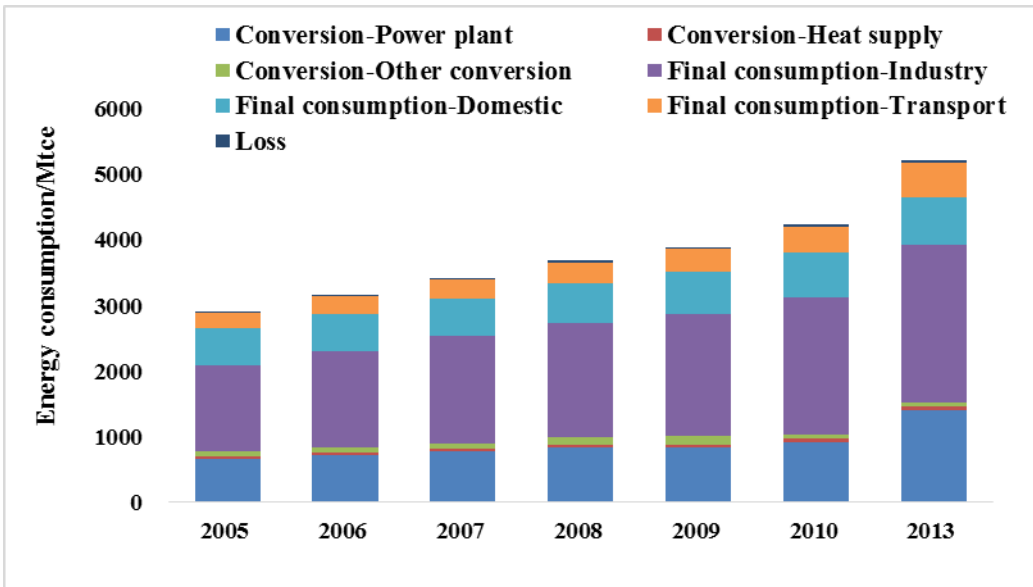

(b) Energy consumption by sector

Figure S1 Energy consumption in China from 2005-2013

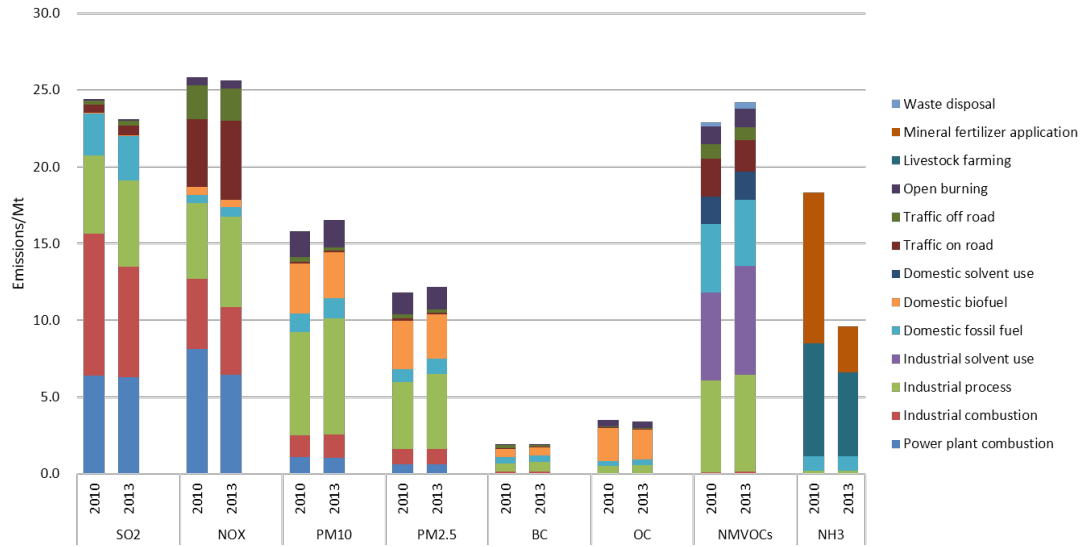

Figure S2 Comparison of emissions for year 2010 and 2013 in China
